# Supplementary material
Source: PubMed Central journal article supplement (PMC8678335)
Supplement: NIHMS1753264-supplement-supplemental.pdf [file NIHMS1753264-supplement-supplemental.pdf]

1 **Physiological Assessment of Delirium Severity using Quantitative EEG: The E-**  
2 **CAM-S**

3 **Running head:** Delirium and Outcomes from EEG

4

5 **Supplemental Digital Content**

6

7 **1. Material and Methods**

8 This section describes the methods, particularly technical aspects, in more detail.

9

10 **1.1. Study Setting and Participants**

11 We conducted a single-center, retrospective, observational cohort study of adult inpatients who  
12 underwent EEG monitoring as a part of routine clinical care at Massachusetts General Hospital  
13 (MGH) between August 2015 to December 2019. Patients were considered from all wards,  
14 including medical, surgical, and neurological floors, as well as intensive care units (ICUs). Patients  
15 were excluded if they had a recorded history of dementia, other intellectual disability, deafness,  
16 aphasia, or were non-English speaking (if non-comatose). The study was conducted under a  
17 protocol approved by the Institutional Review Board using a waiver of consent.

18

19 **1.2 Clinical Data**

20 Patients were assessed to determine delirium presence and severity at the bedside by study staff.  
21 Staff were trained to perform assessments through a combination of didactics, literature review,

22 in person case reviews, and ongoing discussions. Assessments were performed either during or  
23 within 1 hour of beginning or discontinuation of EEG recording. Delirium presence was assessed  
24 using the CAM short form<sup>S1</sup>. Delirium severity was assessed using the CAM-S scoring method<sup>2</sup>.  
25 The CAM-S Short Form scores the severity of four features: (1) Acute onset & fluctuating course  
26 (0 or 1 point); (2) Inattention (0, 1, 2 points); (3) Disorganized thinking (0, 1, 2 points); and (4)  
27 Altered level of consciousness (0, 1, 2 points). Delirium severity is scored as the sum of the  
28 severity of all four features (total between 0 and 7 points). Responses to individual questions  
29 were considered “normal” only if there was an unequivocally correct response. In cases where a  
30 patient did not answer a question, the question was repeated. If questions remained unanswered  
31 (including due to a decreased level of arousal), non-answers were scored as incorrect. Patients  
32 were also evaluated with the Richmond Agitation Sedation Scale (RASS; range -5 to +4, normal  
33 score 0<sup>S2</sup>) to assess level of consciousness. Under the above framework, comatose patients (RASS  
34 score of -4 or -5) were assigned a CAM-S short form score of 7, given that coma and delirium are  
35 increasingly considered part of a spectrum of manifestations of underlying encephalopathy  
36 pathophysiology<sup>S3,S4</sup>. The analyses below were performed, however, on both the entire cohort  
37 (non-delirious, delirious, and comatose patients) and after excluding patients with coma  
38 (retaining non-delirious and delirious patients). Clinical outcomes, including length of stay and in-  
39 hospital mortality, and Charlson Comorbidity Index (CCI)<sup>S5</sup> were extracted and calculated from  
40 the medical record.

41

### 42 **1.3 EEG Recording and Pre-Processing**

43 EEGs were recorded with Ag/AgCl scalp electrodes using the standard international 10-20 system  
44 for electrode placement; however, we calculated the E-CAM-S using only the four frontal  
45 channels, as forehead electrodes are more amenable to application with less technical  
46 experience. We selected the following bipolar frontal channels for analysis: Fp1-Fp2, Fp1-F7, Fp2-  
47 F8, F7-F8. All EEGs were resampled to 200 Hz and normalized to have zero mean, notch-filtered  
48 at 60 Hz, and bandpass filtered from 0.5 Hz to 30 Hz to reduce line noise and myogenic artifacts.  
49 For patients referred for routine EEGs, the EEG recordings had durations between 20 and 60  
50 minutes. For patients undergoing long-term EEG monitoring, we selected the one-hour segment  
51 in which the clinical CAM-S score was obtained (30 minutes before and after the clinical  
52 assessment). The selected EEG signals were segmented into non-overlapping 6-second epochs  
53 and automatically checked for artifacts by identifying segments with absolute value  $> 500 \mu\text{V}$  or  
54 standard deviation  $< 1 \mu\text{V}$  in any channel. Epochs not flagged as containing artifacts were  
55 subsequently used for feature extraction.

56

### 57 **1.4 Feature Extraction**

58 From each 6-second epoch, we extracted 298 features from time and frequency domains, as  
59 summarized in **Supplemental Table 1**<sup>56,57</sup>. Each feature was calculated for each of the four bipolar  
60 channels and then averaged across all channels. This resulted in 298 features for each 6-second  
61 epoch. We then calculated four summary statistics for each feature across all 6-second epochs:  
62 average, standard deviation, minimum and maximum value, resulting in a total of  $298 \times 4 = 1192$

63 feature values per EEG recording. We performed pre-processing and feature extraction using  
64 MATLAB (version 2019a, Mathworks, Natick, MA, USA).

65

### 66 **1.5 Model training and cross validation**

67 Data was split into training and testing data at the patient level, with 90% of EEGs (n = 336) used  
68 for training, and 10% (n = 37) for testing. This splitting of data and model training was repeated  
69 10 times, allowing model performance to be evaluated once on each EEG (10-fold cross  
70 validation). To avoid overfitting, strict separation was maintained between training and testing  
71 data, such that all reported model performance statistics reflect performance on held-out testing  
72 data. Model training and evaluation was performed in Python (version 3.8.0).

73

74 We created the E-CAM-S by training a machine learning model that uses EEG features as inputs  
75 and attempts to produce scores that are correlated with the clinical CAM-S score (0 - 7). The  
76 model used is a Learning-to-Rank (LTR) ordinal regression model<sup>58</sup>. Our LTR model is based on a  
77 pairwise approach: a binary classifier, using logistic regression with LASSO penalty, was trained  
78 to predict, for each pair of patients A and B, whether A is more severely delirious than B. The  
79 value of the decision function of the binary classifier for a particular patient results in the E-CAM-  
80 S score, a continuous number indicating delirium severity, bounded between 0 and 1.

81

82 Feature selection during model training was accomplished using a two-step procedure:

83 1) We used a simple approach that selects features with large k Spearman's correlation. We  
84 experimented with different values of k (see below).

85 2) In order to select among the features that remained, we utilized internal cross validation (ICV)  
86 to fit the LTR model, using a least absolute shrinkage and selection operator (LASSO) penalty. This  
87 penalty is a non-negative number, whose value is determined by the process of ICV.

88  
89 The two free parameter values (number of univariate selected features  $k$  and the LASSO penalty  
90 parameter value) are known as hyperparameters, and the process of choosing these parameters  
91 using ICV is known as hyperparameter optimization. These hyperparameter values were tuned  
92 using internal 10-fold internal cross validation to optimize the Root Mean Squared Error (RMSE)  
93 on the internal validation set. The lowest RMSE was achieved when using  $k = 65$  and a LASSO  
94 penalty of 100, therefore these hyperparameters were used for final analyses.

95  
96 Analyses were performed using the entire cohort and a non-comatose subset. The distribution  
97 of clinically assessed delirium severity scores as present in both the entire cohort and non-  
98 comatose subset can be seen in **Supplemental Figure 1**.

99

#### 100 ***Technical Background on External and Internal Cross Validation.***

101 We trained and evaluated the model using nested cross validation (NCV), a method which  
102 employs external and internal cross validation (ECV, ICV). ECV and ICV share similar mechanics,  
103 but each serves a unique purpose: ECV is used to avoid inflation of model performance  
104 estimates, whereas ICV prevents model overfitting. **Supplemental Figure 3** shows an overview  
105 diagram of nested cross validation and further explanation and elaboration on the exact used  
106 method is given below.

107  
108  
109  
110  
111  
112  
113  
114  
115  
116  
117  
118  
119  
120  
121  
122  
123  
124  
125  
126  
127  
128

The ECV approach here is k-fold cross validation, in which we have chosen to use  $k = 10$  folds. The choice of  $k = 10$  is widely used in developing and evaluating machine learning models, as it generally achieves a favorable bias-variance tradeoff<sup>ff59,S10</sup>. In this method, we split the data into 10 folds, with nine folds (i.e. 90% of the data) reserved for training and one fold (i.e. 10% of the data, 37 subjects in this case) for testing in each round. We then conduct 10 rounds of cross validation, with a different combination of folds in each round, such that each individual fold is used as the testing data in one of the 10 rounds. This approach in turn generates 10 models, due to different subsets of folds being used in each round of training. These models will generally be similar, but not identical, because a different 10% of the data is held out for testing for each round of ECV.

ECV avoids overestimating model performance by strictly separating training and testing data, such that only model predictions generated from *testing* data are used to evaluate model performance. In contrast, if we did not employ ECV, and we instead fitted and tested the model with the same data, our evaluation of performance would be unable to identify overfitting. Rather, we could find an artificially high correlation coefficient (R) between the CAM – S and VE – CAM – S scores, i.e. an upwardly biased estimate, and the model would potentially fail when applied to new data despite a high coefficient. However, if model overfitting has occurred, ECV will reflect this as poor average model performance on the held out data across the multiple rounds of external cross validation, and we will be aware of this overfitting.

129 Through ECV, we are able to utilize data from all subjects in the evaluation of model  
130 performance. Indeed, figure 2 includes all subjects rather than just 37, because the correlation  
131 coefficient of 0.68 was calculated based on all subjects. This correlation coefficient is not biased  
132 (i.e. over fit) because this estimate was calculated entirely based on the test folds, which  
133 contain subjects that were not used in training within a given round of cross validation. In this  
134 way, ECV prevents inflated estimates of the correlation coefficient.

135

136 *ICV is one of several approaches to avoiding overfitting during model training*

137 The mechanics of ICV are similar to ECV; however, it is important to keep in mind that ICV  
138 operates entirely on the training data; the held-out testing data is not used. In ICV, the training  
139 data are split into a series of folds, and each fold takes a turn serving as the (internal) testing  
140 set while the remaining training data is used to fit the model. In the standard approach, which  
141 we follow, ICV is repeated multiple times using different values of the regularization parameter.  
142 The results of ICV are used to construct a curve of average model performance on the internal  
143 test data as a function of the regularization parameter value. This curve is used to select the  
144 value of the regularization parameter that achieves the best average performance during ICV.  
145 This parameter value is then used to fit a final model on the entire set of training data. This fit  
146 model is then tested on the external held out testing data. The entire ICV procedure is repeated  
147 across the 10 folds of external cross validation (ECV).

148

149 In summary, ECV and ICV have similar methods, but serve distinct purposes. ECV aims to obtain  
150 accurate (unbiased) estimates of model performance, regardless of how the model was fit. By

151 contrast, ICV is one of several techniques that aim to avoid overfitting during model  
152 development. ICV helps to avoid model overfitting by separating the training data into folds,  
153 internally simulating the model testing process, in hopes of finding parameter values that will  
154 lead to good model performance during testing on new data.

155

#### 156 *Other methods used in this paper to avoid model overfitting during model training*

157 In the present paper, we use three approaches to avoid model overfitting:

158 1) We filtered out features (in training data) with minimal correlation to the outcome of  
159 interest.

160 2) We applied a penalty term when fitting our ordinal logistic regression model.

161 3) We employed *internal* cross validation (ICV) to select the optimal value of the regularization  
162 parameter in the logistic regression model, as described above.

163

164

### 165 **1.6 Association of E-CAM-S with Mortality and Hospital Length of Stay**

166 To evaluate the clinical significance of E-CAM-S scores, we assessed their association with in-  
167 hospital mortality using multivariable logistic regression, including age, sex, and CCI as additional  
168 covariates. Age, CAM-S, and CCI were z-normalized prior to model fitting. To compensate for data  
169 imbalance (see **Supplemental Figure 2** for histograms of the data set distribution), we assigned  
170 a weight to each patient inversely proportional to the number of patients with that mortality  
171 status. Association with in-hospital mortality was calculated as the average area under the  
172 receiver operating curve (AUROC) using 10-fold cross validation under three conditions: without



173 any delirium information, with E-CAM-S scores included, and with clinically assessed CAM-S  
174 scores included.

175  
176 To determine associations with hospital length of stay, we used log-transformed length of stay  
177 as the dependent variable. We then performed multivariable linear regression with three models:  
178 without any delirium information, with E-CAM-S scores included, and with clinically assessed  
179 CAM-S scores included. Results are reported as Spearman correlations of each multivariable  
180 prediction model.

181

## 182 **1.7 Statistical Reporting**

183 Medians, interquartile ranges, and proportions were calculated for descriptive analysis given that  
184 most of the data was not normally distributed. Groups were compared with Mann-Whitney rank-  
185 sum tests and proportions with chi-squared tests. To estimate the 95% CI of the performance  
186 metrics and the coefficients of the prediction models, we used 1000 rounds of bootstrapping. In  
187 each iteration of bootstrapping, 10-fold cross-validation was performed. The significance level  
188 for all tests was set at  $\alpha = 0.05$ .

189

190 To evaluate the correlation between E-CAM-S and clinically assessed CAM-S, we used Spearman  
191 correlation coefficients. To evaluate the ability of E-CAM-S to discriminate between patients with  
192 vs. without delirium, we used AUROC. We also compared the E-CAM-S with a previously  
193 published method<sup>S11</sup> for assessing delirium based on the EEG, using Spearman correlations with  
194 the CAM-S and AUROC for predicting delirium presence as evaluation metrics.

196 **2. Overview of EEG Features**197 **Supplemental Table 1:** Extracted EEG features used for the prediction models.

| Domain    | Feature                                                                                                                                                                                                                                                                                              | Number                  | Remark                                                                                                                                                                                                                                                     |
|-----------|------------------------------------------------------------------------------------------------------------------------------------------------------------------------------------------------------------------------------------------------------------------------------------------------------|-------------------------|------------------------------------------------------------------------------------------------------------------------------------------------------------------------------------------------------------------------------------------------------------|
| time      | Mean, median, 25% percentile, 75% percentile, standard deviation, variance, mean absolute gradient, line-length, Zero Crossing Rate, Hjorth mobility, Hjorth complexity, skewness, kurtosis, Shannon entropy, Higuchi fractal dimension                                                              | 15                      |                                                                                                                                                                                                                                                            |
| frequency | Mean spectral (center) frequency, power at center frequency, spectral bandwidth, spectral entropy, spectral edge frequencies: SEF95 and SEF5.                                                                                                                                                        | 6                       | Computed over the whole spectrogram (0.5-30 Hz):                                                                                                                                                                                                           |
|           | Harmonic indexes computed for specific frequency bands and ratios: mean, median, min, max, std, iqr, 5% percentile, 95% percentile.                                                                                                                                                                  | 8x7=56                  | Delta (0.5-4), theta (4-8), alpha (8-12), beta (13-20), delta/theta, delta/alpha, theta/alpha.                                                                                                                                                             |
|           | Power Spectral Density (PSD) of different frequency bands and band-ratios, calculated for both the PSD value in dB + relative PSD value (PSD value in band x / PSD whole spectrogram). Calculated separately for different frequency bands (26) and the band-ratios (e.g. PSD delta/PSD alpha) (27). | 26x2 +<br>27x2<br>= 106 | <u>Delta</u> : 0.2-3, 0.5-2, 0.5-3, 0.5-4, 1-4, 1-5, 1-6, 2-4, 2-6 Hz<br><u>Theta</u> : 3-7, 4-6, 4-8, 6-8 Hz<br><u>Alpha</u> : 7-12, 8-10, 8-11, 8-12, 8-13, 10-12 Hz<br><u>Beta</u> : 11-16, 11-20, 12-30, 15-25, 21-29 Hz<br><u>All</u> : 1-20, 1-30 Hz |
|           | Coherence for different frequency bands (26) and band ratios (27), calculated for both the mean and sum of the coherence in the specific bands.                                                                                                                                                      | 26x2 +<br>27x2<br>= 106 | Same bands/ratio's as for PSD calculation.                                                                                                                                                                                                                 |

|                                         |                                                                                                                                                                       |                          |                                                                                                                               |
|-----------------------------------------|-----------------------------------------------------------------------------------------------------------------------------------------------------------------------|--------------------------|-------------------------------------------------------------------------------------------------------------------------------|
|                                         | FOOOF parameters: max amplitude, max frequency, max bandwidth, number of peaks, broadband offset and exponent of aperiodic fit (for both 1-15 Hz and 15-30 Hz range). | 8                        | FOOOF parameterizes neural power spectra: <a href="https://foof-tools.github.io/foof/">https://foof-tools.github.io/foof/</a> |
| # features                              |                                                                                                                                                                       | = 298                    | for each 6 seconds epoch                                                                                                      |
| <i>Total number of features per EEG</i> |                                                                                                                                                                       | $298 \times 4$<br>= 1192 | <i>Average, std, min, max across all 6-second epochs.</i>                                                                     |

198

199

200 **3. Data set distribution**

201

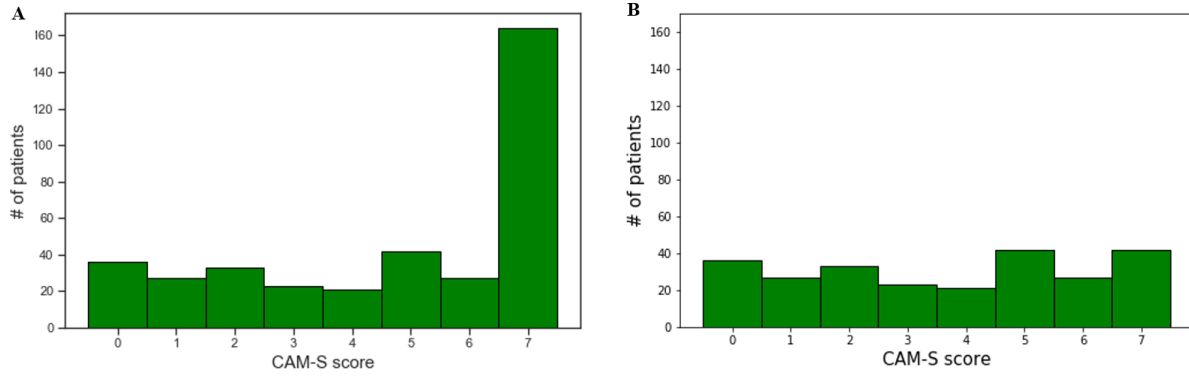

202

203 **Supplemental Figure 1:** Histogram of CAM-S distribution for entire population **(A)** and non-  
204 comatose subset **(B)**.

205

206

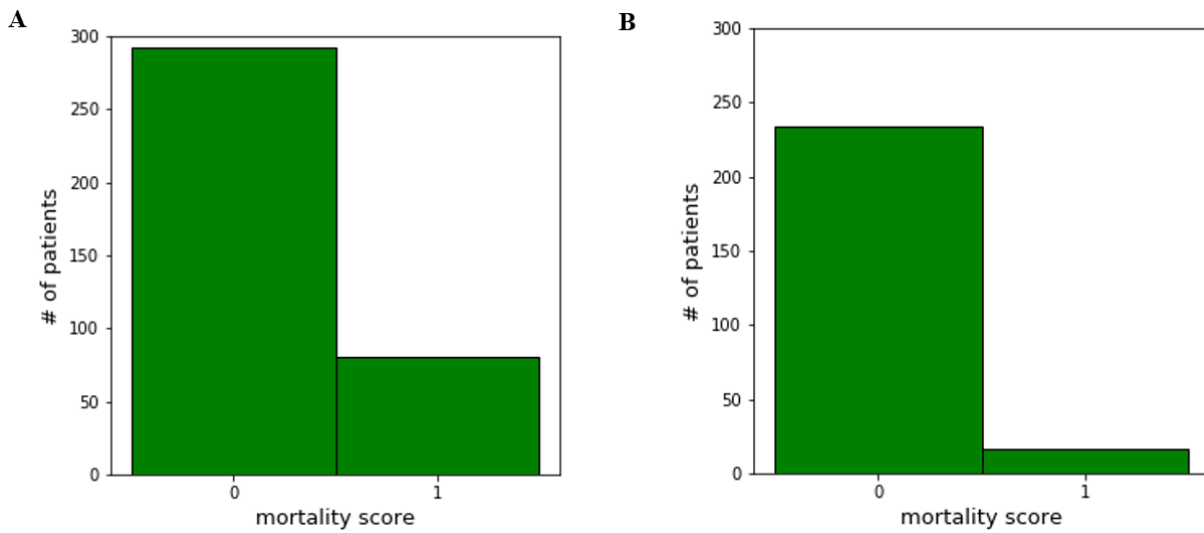

207

208 **Supplemental Figure 2:** Histogram of mortality score distribution for entire population **(A)** and  
209 non-comatose subset **(B)**.

210

211 **4. Methods: nested cross-validation**

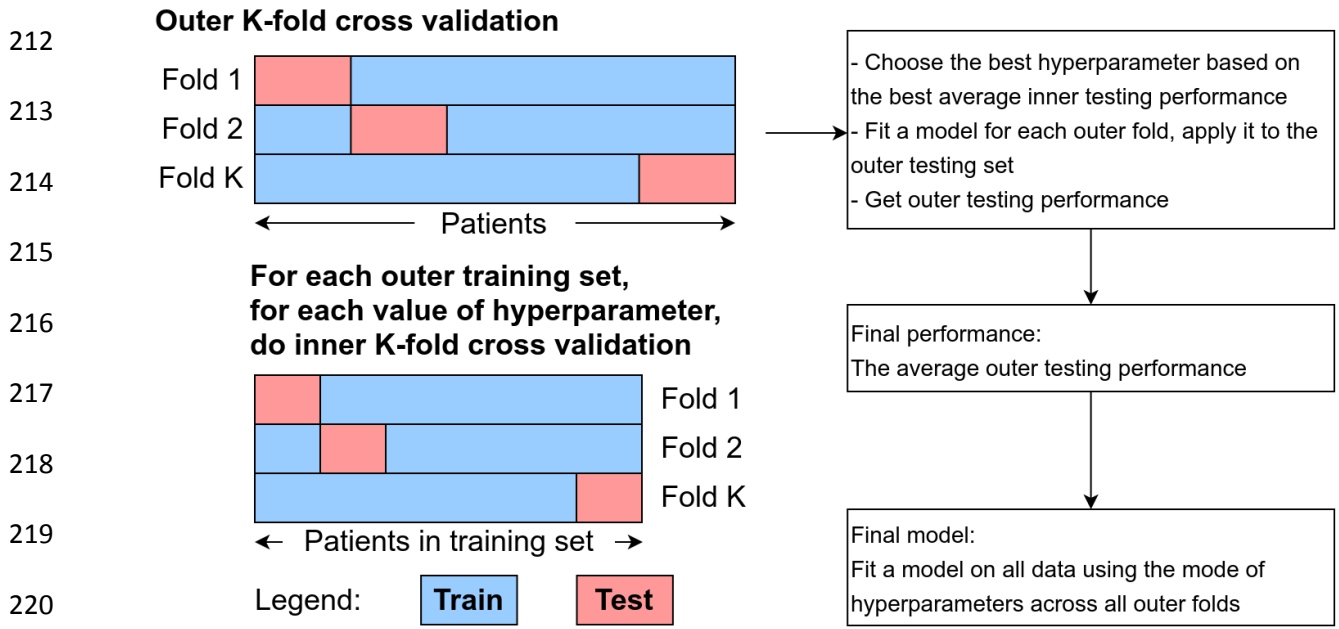

221 **Supplemental Figure 3: Diagram showing nested cross-validation.**

222  
223  
224  
225  
226  
227  
228  
229  
230  
231  
232  
233  
234

235 **5. EEG-based delirium severity prediction for the non-comatose subset**

236 **Supplemental Table 2:** Performance metrics delirium prediction comparing using entire  
237 population and non-comatose subset.

| Evaluation metrics | All patients (n = 373) | Non-comatose subset (n = 251) |
|--------------------|------------------------|-------------------------------|
| Correlation        | 0.68 [0.64 – 0.73]     | 0.52 [0.47 – 0.61]            |

(CAM-S, E-CAM)

238

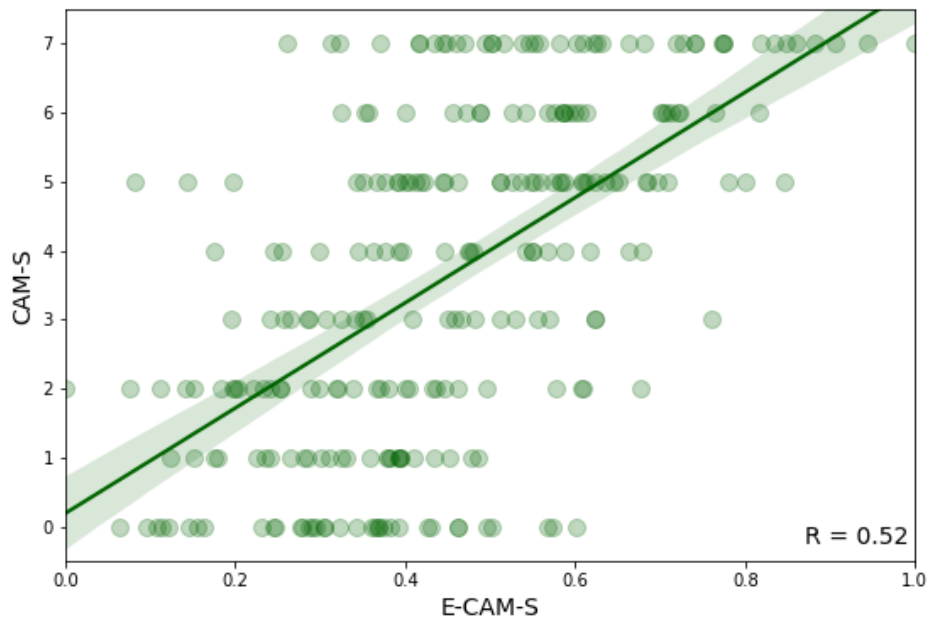

239

240 **Supplemental Figure 4:** Scatter plot of EEG-based delirium severity prediction (E-CAM-S) vs.  
241 CAM-S scores for non-comatose subset. The green line represents a fitted regression line with  
242 95% confidence interval.

243

244 **6. EEG Features Predictive of Delirium Severity**

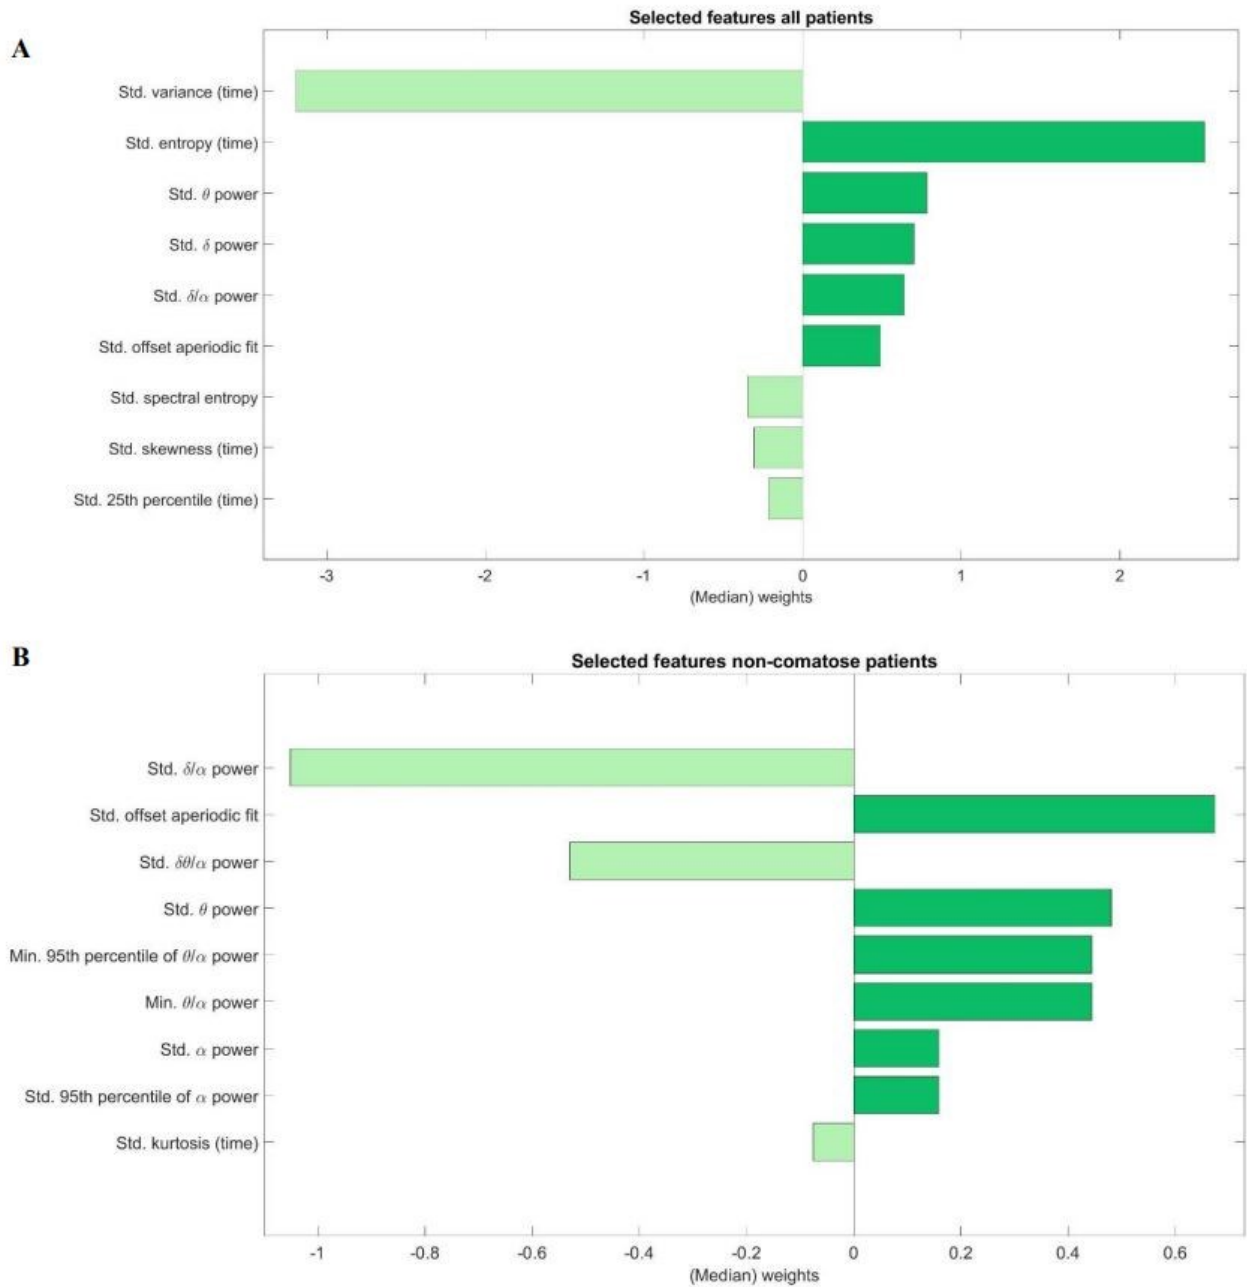

245

246

247 **Supplemental Figure 5:** Influence of most important features for E-CAM-S prediction using the

248 entire cohort **(A)** and non-comatose subset **(B)**, with dark green color reflecting positive

249 correlation and light green color negative correlation with clinical CAM-S. For the features that

250 were calculated over the same frequency range, the median of these weights was taken (e.g.  
251 different features for delta power, either calculated from 0.5-2 Hz or 2-4 Hz). Abbreviations: std  
252 = standard deviation, min = minimum. The first abbreviation reflects the summary statistic (std,  
253 mean, min or max) and the second abbreviation reflects the extracted EEG feature. E.g. “std.  $\delta/\alpha$   
254 power” refers to the standard deviation across all 6-second epochs of the  $\delta/\alpha$  power (that was  
255 calculated for each 6-second epoch).



## References

- S1. Inouye SK, van Dyck CH, Alessi CA, et al: Clarifying confusion: The confusion assessment method: A new method for detection of delirium. *Annals of Internal Medicine*. 1990;113(12):941-948.
- S2. Sessler CN, Gosnell MS, Grap MJ, et al: The Richmond Agitation-Sedation Scale: Validity and reliability in adult intensive care unit patients. *American Journal of Respiratory and Critical Care Medicine*. 2002;166(10):1338-1344.
- S3. Oldham MA, Holloway RG: Delirium disorder: Integrating delirium and acute encephalopathy. *Neurology*. 2020;95(4):173-178.
- S4. Slooter AJC, Otte WM, Devlin JW, et al: Updated nomenclature of delirium and acute encephalopathy: statement of ten Societies. *Intensive Care Medicine*. 2020;46(5):1020-1022.
- S5. Charlson ME, Pompei P, Ales KL, et al: A new method of classifying prognostic comorbidity in longitudinal studies: Development and validation. *Journal of Chronic Diseases*. 1987;40(5):373-383.
- S6. Sun H, Jia J, Goparaju B, et al: Large-scale automated sleep staging. *Sleep*. 2017;40(10).
- S7. Donoghue T, Haller M, Peterson EJ, et al: Parameterizing neural power spectra into periodic and aperiodic components. *Nat Neurosci*. 2020;23:1655-1665.

- S8. Burges C, Shaked T, Renshaw E, et al: Learning to rank using gradient descent. In: *ICML 2005 - Proceedings of the 22nd International Conference on Machine Learning*. ACM Press; 2005:89-96.
- S9 Kohavi R: *A Study of Cross-Validation and Bootstrap for Accuracy Estimation and Model Selection*. International Joint Conference on Artificial Intelligence; 1995;14:1137-1143.
- S10. James G, Witten D, Hastie T et al: *An Introduction to Statistical Learning: with applications in R*. New York: Springer; 2013. S11. Numan T, van den Boogaard M, Kamper AM, et al: Delirium detection using relative delta power based on 1-minute single-channel EEG: a multicentre study. *British Journal of Anaesthesia*. 2019;122(1):60-68.
